# Supplementary material for: Contrasting Patterns and Drivers of Soil Fungal Communities between Two Ecosystems Divided by the Treeline
Source: MDPI journal article supplement (doi:10.3390/microorganisms9112280), 2021-11-02
Supplement: s1 [file s1]

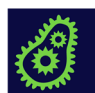**Table S1.** Summary of fungal community composition between forest and meadow and significance of differences based on *t*-tests.

|                     | Forest (%)    | Meadow (%)    | <i>t</i> Tests ( <i>p</i> Value) |
|---------------------|---------------|---------------|----------------------------------|
| <b>phylum</b>       |               |               |                                  |
| Ascomycota          | 55.08 ± 19.05 | 67.29 ± 16.33 | <b>0.031</b>                     |
| Basidiomycota       | 29.65 ± 21.38 | 8.51 ± 6.6    | <b>0.001</b>                     |
| Chytridiomycota     | 0.05 ± 0.12   | 0.1 ± 0.11    | 0.267                            |
| Glomeromycota       | 0.24 ± 0.54   | 0.66 ± 1.11   | 0.127                            |
| Zygomycota          | 3.8 ± 0.85    | 4.12 ± 0.73   | 0.286                            |
| <b>Trophic Mode</b> |               |               |                                  |
| Saprotroph          | 24.04 ± 10.84 | 25.99 ± 10.36 | 0.554                            |
| Symbiotroph         | 29.17 ± 20.89 | 12.07 ± 8.01  | <b>0.001</b>                     |
| Pathogen            | 4.03 ± 3.01   | 3.6 ± 2.57    | 0.621                            |

Table S2. Spearman's correlation between relative abundance of functional guilds and environmental variables

| r-Value      | Animal. Pathogen | Arbuscular. Mycorrhizal | Dung.Sa protroph | Ectomyc orrhizal | Endo phyte | Ericoid.M ycorrhizal | Fungal. Parasite | Leaf.Sap rotroph | Liche nized | Orchid.M ycorrhizal | Plant.Sa protroph | Soil.Sap rotroph | Undefined. Saprotroph | Wood.Sa protroph |
|--------------|------------------|-------------------------|------------------|------------------|------------|----------------------|------------------|------------------|-------------|---------------------|-------------------|------------------|-----------------------|------------------|
| herbri ch    | 0.01             | 0.38                    | 0.25             | <b>−0.57</b>     | 0.02       | −0.17                | −0.03            | <b>0.55</b>      | 0.02        | 0.44                | 0.45              | −0.12            | −0.14                 | −0.34            |
| plantr ich   | −0.07            | 0.04                    | 0.00             | −0.09            | 0.05       | 0.12                 | 0.20             | 0.22             | −0.03       | 0.20                | 0.42              | −0.03            | −0.15                 | −0.07            |
| ST           | −0.03            | −0.15                   | −0.36            | <b>0.49</b>      | −0.16      | 0.39                 | 0.12             | −0.43            | −0.14       | −0.30               | −0.15             | −0.04            | −0.02                 | 0.13             |
| SM           | 0.29             | −0.03                   | 0.00             | 0.02             | 0.03       | −0.31                | 0.02             | −0.01            | 0.19        | 0.18                | −0.22             | 0.03             | −0.16                 | 0.11             |
| littert hick | −0.04            | −0.03                   | −0.23            | 0.17             | −0.25      | 0.05                 | −0.15            | −0.33            | 0.07        | 0.03                | −0.01             | 0.03             | −0.09                 | 0.08             |
| BD           | −0.32            | 0.02                    | −0.14            | 0.06             | 0.10       | 0.47                 | −0.12            | 0.11             | −0.05       | −0.11               | 0.13              | 0.12             | −0.04                 | 0.02             |
| pH           | 0.06             | −0.19                   | 0.37             | −0.28            | −0.08      | −0.26                | 0.17             | 0.23             | −0.41       | −0.12               | 0.27              | 0.06             | 0.05                  | −0.03            |
| clay         | −0.03            | 0.04                    | −0.02            | 0.00             | 0.27       | 0.28                 | 0.14             | −0.06            | 0.03        | 0.00                | 0.14              | 0.09             | 0.19                  | 0.13             |
| silt         | −0.08            | 0.37                    | 0.16             | −0.46            | −0.27      | −0.29                | −0.22            | 0.39             | −0.10       | 0.27                | 0.20              | −0.14            | −0.12                 | −0.23            |
| sand         | 0.14             | −0.34                   | −0.14            | 0.38             | −0.02      | 0.02                 | 0.08             | −0.25            | 0.08        | −0.19               | −0.27             | 0.03             | −0.08                 | 0.14             |
| TN           | 0.13             | 0.21                    | 0.34             | −0.41            | −0.05      | <b>−0.61</b>         | −0.27            | 0.27             | 0.11        | 0.15                | 0.15              | 0.09             | −0.03                 | −0.10            |
| TC           | 0.14             | 0.13                    | 0.35             | −0.35            | −0.01      | <b>−0.60</b>         | −0.21            | 0.20             | 0.13        | 0.17                | 0.13              | 0.14             | 0.04                  | −0.08            |
| C:Nra tio    | 0.11             | −0.23                   | 0.14             | 0.20             | 0.18       | 0.09                 | 0.32             | −0.06            | 0.19        | 0.16                | −0.01             | 0.00             | 0.32                  | 0.10             |
| AP           | −0.12            | 0.24                    | 0.30             | −0.28            | −0.18      | −0.34                | −0.30            | 0.25             | 0.15        | 0.07                | 0.09              | −0.19            | −0.03                 | −0.11            |
| AN           | 0.16             | 0.19                    | 0.34             | −0.38            | −0.02      | <b>−0.52</b>         | −0.23            | 0.27             | 0.11        | 0.17                | 0.16              | 0.06             | −0.04                 | −0.11            |

$P < 0.05$  is shown in bold. SM, soil moisture; TN, total nitrogen; TC, total carbon; C:N ratio, ratio of total carbon and total nitrogen; AP, available phosphorus; AN, available nitrogen; TP, total phosphorus.

**Table S3.** Molecular ecological network and random network parameters of forest and meadow soil fungal communities

| Location | Similarity Threshold | Nodes | Links | Molecular Ecological Network |                           |                                |            |                | Random Network            |                                |               |
|----------|----------------------|-------|-------|------------------------------|---------------------------|--------------------------------|------------|----------------|---------------------------|--------------------------------|---------------|
|          |                      |       |       | Average Connectivity         | Average Geodesic Distance | Average Clustering Coefficient | Modularity | r <sup>2</sup> | Average Geodesic Distance | Average Clustering Coefficient | Modularity    |
| Forest   | 0.60                 | 69    | 122   | 3.56 *                       | 4.63 *                    | 0.21                           | 0.56 *     | 0.82           | 3.351 ± 0.105             | 0.064 ± 0.020                  | 0.464 ± 0.014 |
| Meadow   | 0.60                 | 91    | 252   | 5.54 *                       | 3.01 *                    | 0.23                           | 0.46 *     | 0.75           | 2.796 ± 0.039             | 0.099 ± 0.017                  | 0.344 ± 0.012 |

\*,  $P < 0.05$ , representing significant differences between the molecular ecological networks of forest and meadow soil fungal communities.

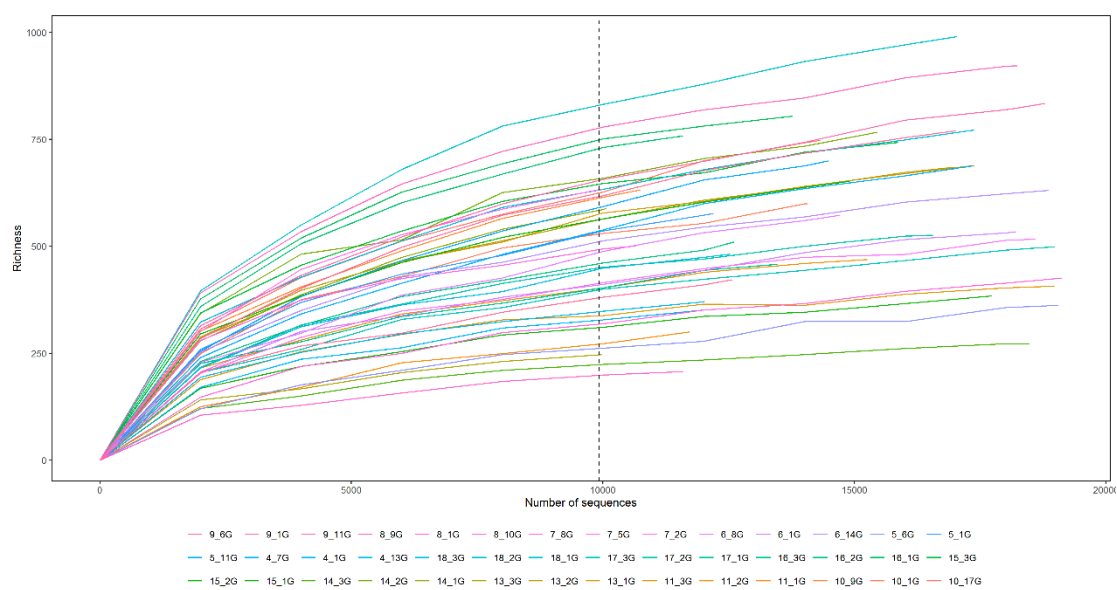

**Figure S1.** Rarefaction curves of high-throughput sequencing data of the samples.

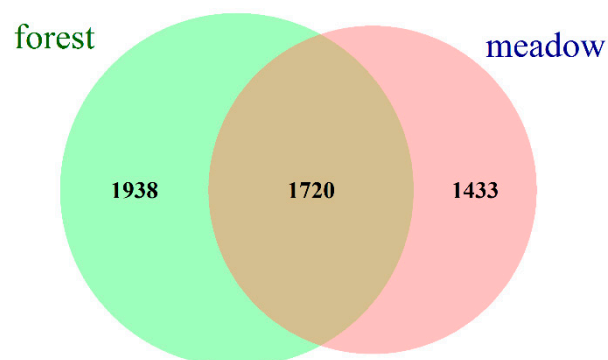

**Figure S2.** Venn diagram showing numbers of unique and shared fungal OTUs between forest and meadow.

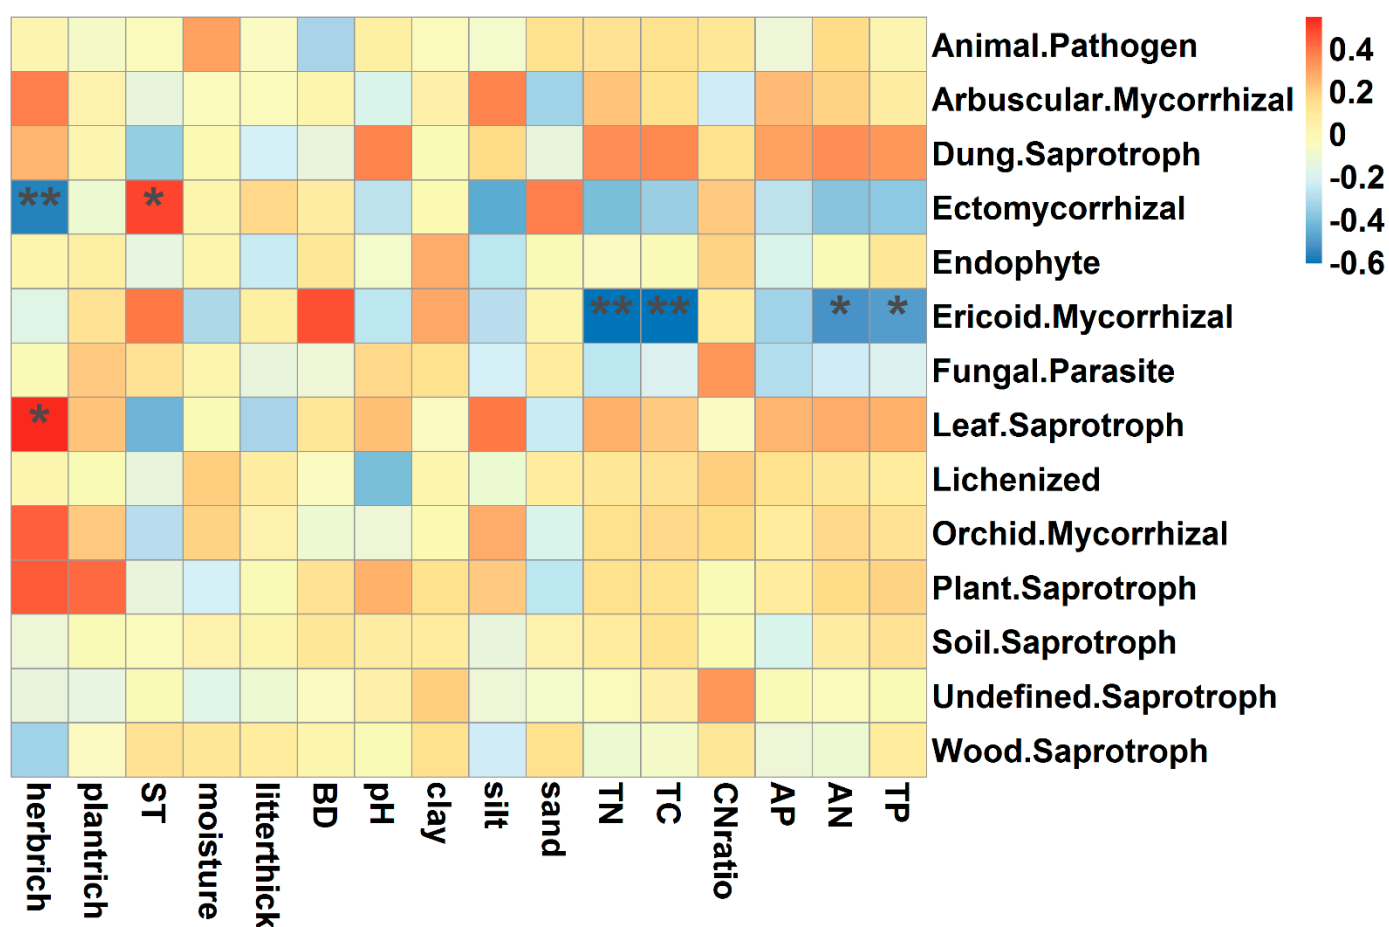

**Figure S3.** Spearman's correlation between relative abundance of functional guilds and environmental variables. ST, soil temperature; TN, total nitrogen; TC, total carbon; C:N ratio, ratio of total carbon and total nitrogen; AP, available phosphorus; AN, available nitrogen; TP, total phosphorus.
